# Supplementary material for: Spiny lobsters use urine-borne olfactory signaling and physical aggressive behaviors to influence social status of conspecifics
Source: Oxford University Press journal article supplement (doi:10.1242/jeb.026492), 2009-07-18
Supplement: jeb026492-figs2.pdf [file jeb026492-figs2.pdf]

# Behavioral Assay of Stimuli Influencing Urine Release

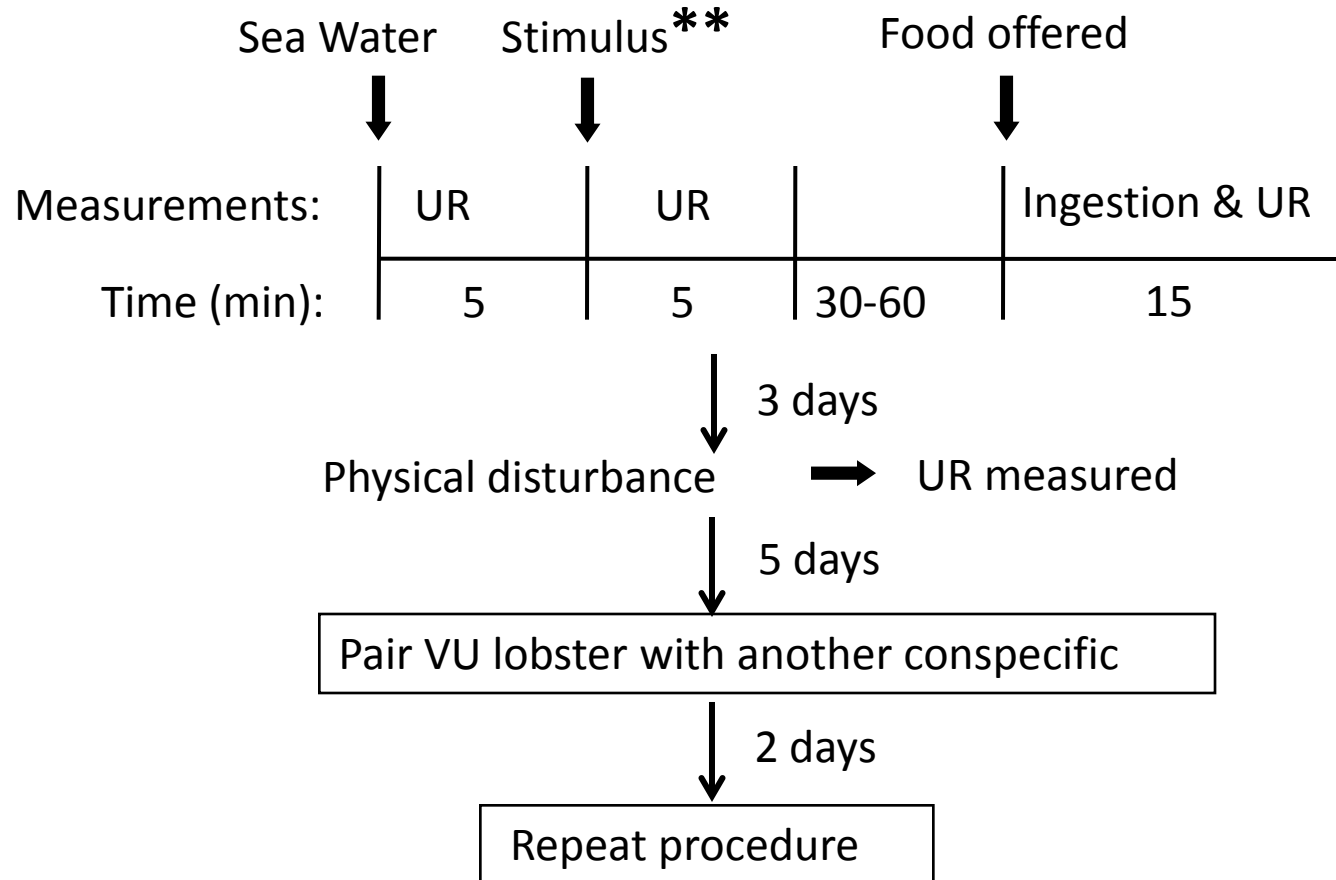

\* Urine Release (UR) measured as number and duration of pulses

\*\* Stimulus = conspecific urine, conspecific hemolymph, shrimp juice, or physical disturbance
