# Supplementary material for: Spiny lobsters use urine-borne olfactory signaling and physical aggressive behaviors to influence social status of conspecifics
Source: Oxford University Press journal article supplement (doi:10.1242/jeb.026492), 2009-07-18
Supplement: jeb026492-figs4.pdf [file jeb026492-figs4.pdf]

# Behavioral Assay of the Role of Urine Release in Communicating Social Status

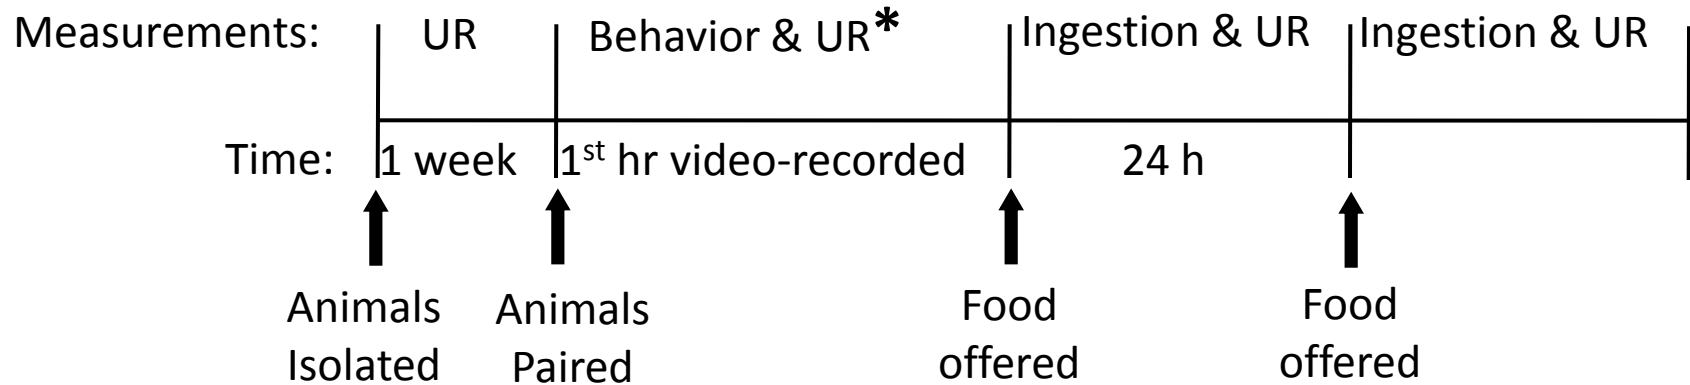

## \*Behaviors:

Agonistic: Antennae-locking, Antenna-grabbing, Leg-grabbing, Abdomen-poking

Avoidance: Retreat, Tail-flipping, Stridulating

\*UR - Urine Release measured as volume per mL
