# Supplementary material for: Spiny lobsters use urine-borne olfactory signaling and physical aggressive behaviors to influence social status of conspecifics
Source: Oxford University Press journal article supplement (doi:10.1242/jeb.026492), 2009-07-18
Supplement: jeb026492-figs5.pdf [file jeb026492-figs5.pdf]

# Behavioral Assay of Responses to Urine

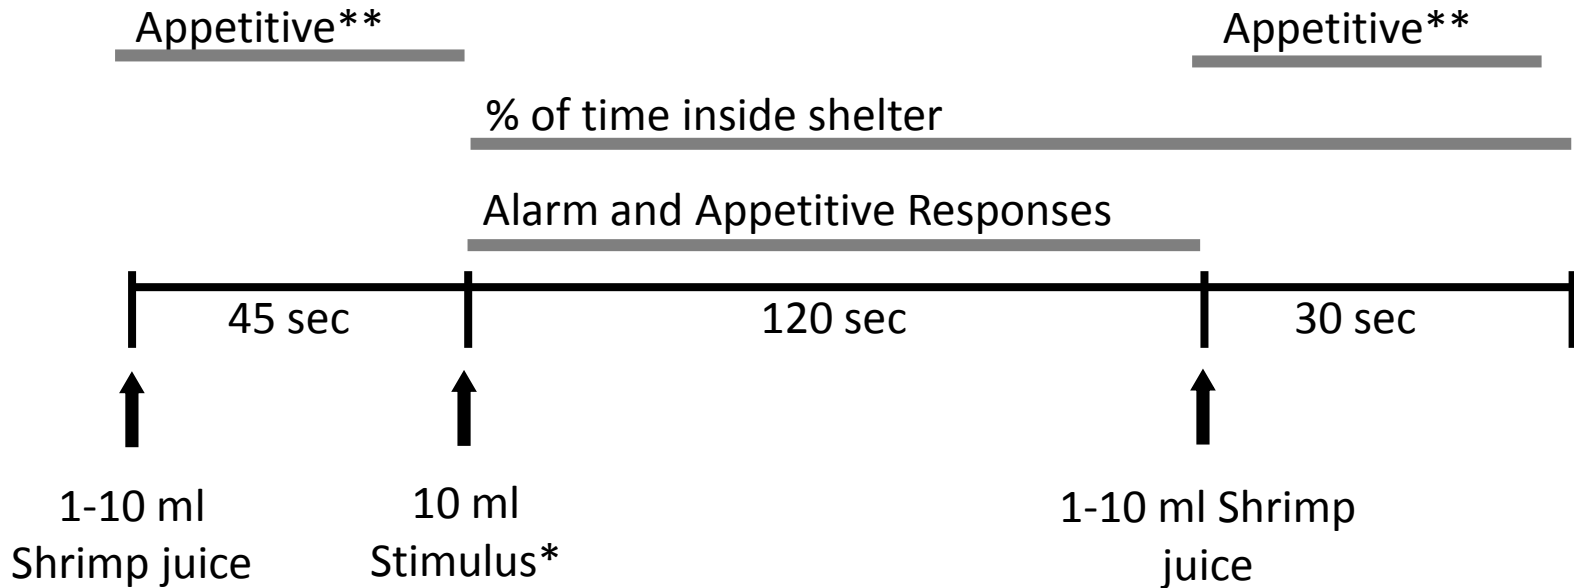

\* Stimulus: Urine from undisturbed and disturbed lobsters, seawater

\*\* Appetitive: Appetitive (approach) responses before and after stimulus delivery
