# Supplementary figures and images for: Spiny lobsters use urine-borne olfactory signaling and physical aggressive behaviors to influence social status of conspecifics
Source: Oxford University Press journal article supplement (doi:10.1242/jeb.026492), 2009-07-18

**A**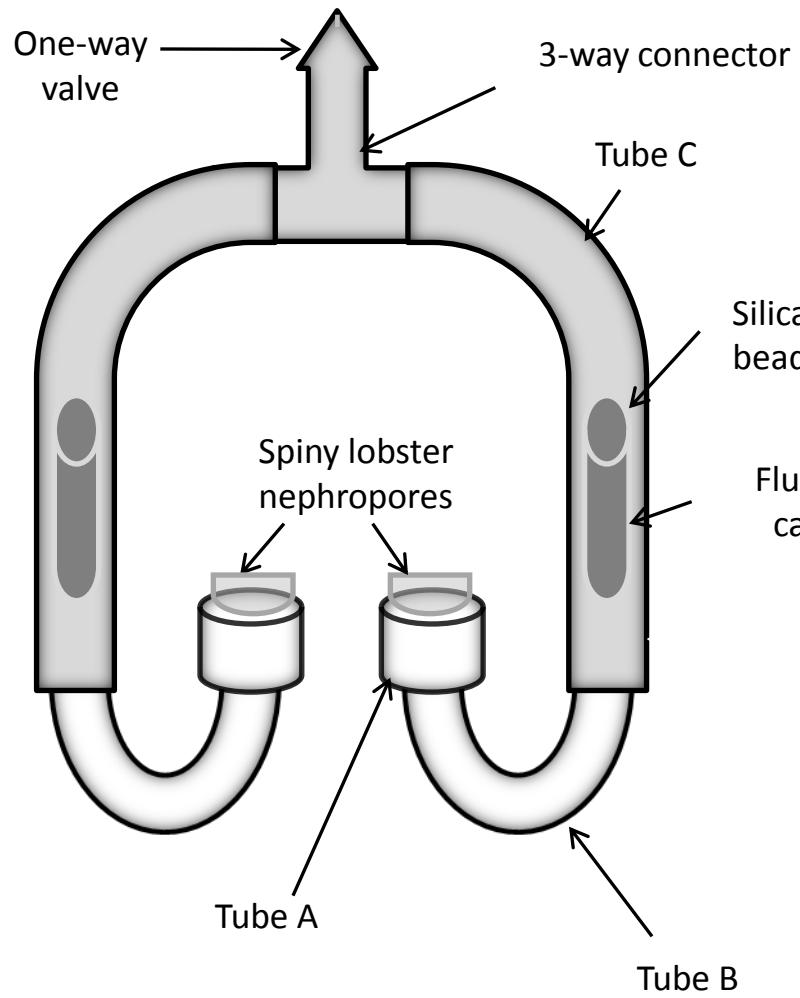**B**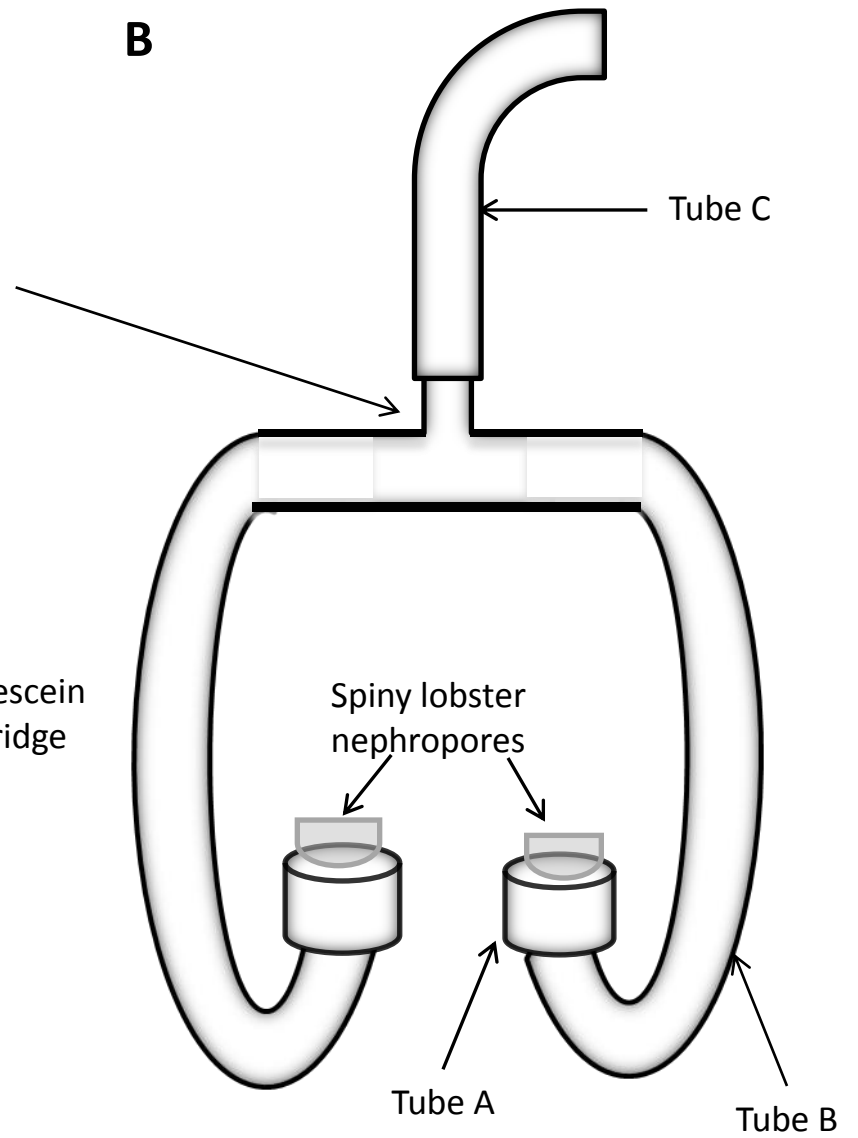

Supplement: jeb026492-figs1.pdf [file jeb026492-figs1.pdf]
